# Supplementary material for: HrpA, a DEAH-Box RNA Helicase, Is Involved in Global Gene Regulation in the Lyme Disease Spirochete
Source: PubMed Central journal article supplement (PMC3144200; doi:10.1371/journal.pone.0022168), 2011-07-26
Supplement: pone.0022168.s003.pdf [file pone.0022168.s003.pdf]

| Table S1. Primers used in this study                                 |                                                       |                                                     |                                |
|----------------------------------------------------------------------|-------------------------------------------------------|-----------------------------------------------------|--------------------------------|
| <b>Primers used for knockout plasmid construction and screening</b>  |                                                       |                                                     |                                |
| Genotype                                                             | Target (f/r)                                          | Inverse                                             | Knockout (KO f/r)              |
| <i>hrpA</i>                                                          | B1219f-GTTATTTTTGTATTCCGCTTT                          | B1229-ATGCAATCCGCTAGCAAAGCTCTAAATAAAGAAGCTT         | B1398-TTAAATCTTCAAAGATATTAACAA |
|                                                                      | B1220r-TTCGTCTGCTACAATAAACAC                          | B1230-ATGCAATCCGCTAGCTTGAGTTGCTGATGATTTT            | B1399-GCAGGAAGACTTTCAAAA       |
| <i>bb0826</i>                                                        | B1845f-GCATAAAAATATAACGGTTTTTAACA                     | B1848-GCGCTAGCTAGCTAGGTTTATAAATTATTATAAACTTCATTGCTG | B1876-GGCTATCCTTTTTTATGTTTTATT |
|                                                                      | B1846r-CCTATTATTGTTCTTGGGTGC                          | B1849-GCGCTAGCTAGCTAGGATGTCAAATAATTTATCAAATATTCAG   | B1877-CTTCATTATTCTTAATTTAGCG   |
| <b>Primers used for <i>gent</i> cloning and transformant screens</b> |                                                       |                                                     |                                |
| Purpose                                                              | Primer                                                |                                                     |                                |
| Screening                                                            | B348-CGCAGCAGCAACGATGTTAC                             |                                                     |                                |
| Screening                                                            | B349-CTTGCACGTAGATCACATAAGC                           |                                                     |                                |
| Screening                                                            | B1281-ATCGTCTATGCTTAAGCTCTT                           |                                                     |                                |
| Cloning                                                              | B415-CATTTCTAGCTAGCGGCGAATGGCGCGGCCGCCCTAGG           |                                                     |                                |
| Cloning                                                              | B416-CATTTCTAGCTAGCACGCGTAAGCCGATCTCGGCTTG            |                                                     |                                |
| Cloning                                                              | B820-CATTTCTAGCTAGCCCTAGGTAATACCCGAGCTTCAA            |                                                     |                                |
| Cloning                                                              | B1345-CATTTCTAGCTAGCCAGATCCGGATATAGTTCCTCCTTTC        |                                                     |                                |
| Cloning                                                              | B1349-CCAAGTACCGCCACCTAATCAGAATTGGTTAATTGGTTGTAACACT  |                                                     |                                |
| Cloning                                                              | B1350-AGTGTTACAACCAATTAACCAATTCTGATTAGGTGGCGGTACTTGGG |                                                     |                                |
| <b>Primers used for RT-PCR of <i>bb0825</i> and <i>bb0826</i></b>    |                                                       |                                                     |                                |
| Purpose                                                              | Primer                                                |                                                     |                                |
| <i>bb0825</i> RT                                                     | B1762-CACTGCTAGTATTGATTTAAG                           |                                                     |                                |
| <i>bb0825</i> For                                                    | B1755-CTACGGAGAGATTGTAATAAAGC                         |                                                     |                                |
| <i>bb0825</i> Rev                                                    | B1756-GACACCCCTTCCTTCTATTG                            |                                                     |                                |
| <i>bb0826</i> RT                                                     | B1763-GCTACATATGCTTTATGATTTAACC                       |                                                     |                                |
| <i>bb0826</i> For                                                    | B1757-GACTTAGAACAACATTATCTGCTAATTAC                   |                                                     |                                |
| <i>bb0826</i> Rev                                                    | B1758-GAATAAATGCTTTTGGGATAGTTTG                       |                                                     |                                |
|                                                                      |                                                       |                                                     |                                |
|                                                                      |                                                       |                                                     |                                |
|                                                                      |                                                       |                                                     |                                |
