# Supplementary material for: HrpA, a DEAH-Box RNA Helicase, Is Involved in Global Gene Regulation in the Lyme Disease Spirochete
Source: PubMed Central journal article supplement (PMC3144200; doi:10.1371/journal.pone.0022168), 2011-07-26
Supplement: pone.0022168.s005.pdf [file pone.0022168.s005.pdf]

**Table S3. Downregulated *B. burgdorferi* proteins in *hrpA* mutant clones compared to wild-type based upon iTRAQ analysis**

| ORF     | Protein Name                         | Mean $\pm$ SD   | P value | Decrease |
|---------|--------------------------------------|-----------------|---------|----------|
| BB_0241 | GLPK                                 | 0.07 $\pm$ 0.03 | 0.0001  | 14.28    |
| BB_0243 | GLPA                                 | 0.11 $\pm$ 0.02 | 0.0001  | 9.09     |
| BB_0603 | Membrane-assoc. prot p66             | 0.19 $\pm$ 0.07 | 0.0001  | 5.2      |
| BB_A74  | Outer membrane porin                 | 0.25 $\pm$ 0.18 | 0.0001  | 4        |
| BB_0330 | OppA-3                               | 0.29 $\pm$ 0.1  | 0.0001  | 3.44     |
| BB_B29  | PTS malt and gluc ABC comp           | 0.29 $\pm$ 0.1  | 0.0001  | 3.44     |
| BB_0365 | Antigen IPLA7                        | 0.3 $\pm$ 0.14  | 0.0001  | 3.33     |
| BB_B07  | Outer surface prot., putative        | 0.32 $\pm$ 0.11 | 0.0001  | 3.12     |
| BB_0328 | OppA-1                               | 0.34 $\pm$ 0.16 | 0.0001  | 2.94     |
| BB_0337 | Enolase                              | 0.35 $\pm$ 0.06 | 0.0001  | 2.85     |
| BB_0238 | Predicted coding region              | 0.37 $\pm$ 0.11 | 0.0001  | 2.7      |
| BB_J09  | OspD                                 | 0.38 $\pm$ 0.18 | 0.0001  | 2.63     |
| BB_0476 | Translation elong factor TU          | 0.4 $\pm$ 0.13  | 0.0001  | 2.5      |
| BB_0744 | Antigen p83/100                      | 0.41 $\pm$ 0.17 | 0.0001  | 2.43     |
| BB_B06  | PTS cellob. IIB component            | 0.43 $\pm$ 0.04 | 0.0001  | 2.32     |
| BB_0622 | Acetate kinase                       | 0.44 $\pm$ 0.16 | 0.0001  | 2.27     |
| BB_0210 | Surface-located memb prot1           | 0.45 $\pm$ 0.17 | 0.0001  | 2.22     |
| BB_I29  | Predicted protein                    | 0.46 $\pm$ 0.18 | 0.0001  | 2.17     |
| BB_B05  | PTS cellob IIA component             | 0.47 $\pm$ 0.31 | 0.0002  | 2.12     |
| BB_0408 | PTS fruct IIABC component            | 0.48 $\pm$ 0.16 | 0.0001  | 2.08     |
| BB_0020 | PF6P1P $\beta$ sub                   | 0.49 $\pm$ 0.17 | 0.0001  | 2.04     |
| BB_0204 | Lambda CII stability-gov prot (HflC) | 0.49 $\pm$ 0.17 | 0.0001  | 2.04     |
| BB_0329 | OppA-2                               | 0.49 $\pm$ 0.17 | 0.0001  | 2.04     |
| BB_0385 | Basic membrane prot D                | 0.5 $\pm$ 0.17  | 0.0001  | 2        |
| BB_0383 | Basic membrane prot A                | 0.51 $\pm$ 0.19 | 0.0001  | 1.96     |
| BB_0426 | Predicted protein                    | 0.51 $\pm$ 0.24 | 0.0001  | 1.96     |
| BB_0517 | Chaperone protein dnaJ               | 0.51 $\pm$ 0.12 | 0.0001  | 1.96     |
| BB_0649 | 60 kDa chaperonin (groEL)            | 0.52 $\pm$ 0.29 | 0.0002  | 1.92     |
| BB_K47  | Predicted protein                    | 0.52 $\pm$ 0.22 | 0.0001  | 1.92     |
| BB_0323 | Predicted protein                    | 0.54 $\pm$ 0.05 | 0.0001  | 1.85     |
| BB_0608 | Aminoacyl-his dipeptidase            | 0.54 $\pm$ 0.14 | 0.0001  | 1.85     |
| BB_0659 | Lysyl-tRNA synthetase                | 0.56 $\pm$ 0.17 | 0.0001  | 1.78     |
| BB_0375 | Pfs prot                             | 0.57 $\pm$ 0.17 | 0.0001  | 1.75     |
| BB_0462 | Predicted protein                    | 0.57 $\pm$ 0.12 | 0.0001  | 1.75     |
| BB_0024 | Predicted protein                    | 0.58 $\pm$ 0.18 | 0.0001  | 1.72     |
| BB_0668 | Flag filament outer layer prot       | 0.58 $\pm$ 0.25 | 0.0002  | 1.72     |
| BB_0536 | Zinc protease putative               | 0.6 $\pm$ 0.11  | 0.0001  | 1.66     |
| BB_0741 | 10 kDa chaperonin (groES)            | 0.6 $\pm$ 0.2   | 0.0001  | 1.66     |
| BB_0334 | OppD                                 | 0.61 $\pm$ 0.13 | 0.0001  | 1.63     |
| BB_B16  | OppAIV                               | 0.61 $\pm$ 0.29 | 0.0009  | 1.63     |
| BB_0068 | Predicted protein                    | 0.62 $\pm$ 0.11 | 0.0001  | 1.61     |
| BB_O33  | Predicted protein                    | 0.62 $\pm$ 0.12 | 0.0001  | 1.61     |
| BB_0364 | Predicted protein                    | 0.63 $\pm$ 0.08 | 0.0001  | 1.58     |
| BB_B22  | Predicted protein                    | 0.63 $\pm$ 0.12 | 0.0001  | 1.58     |
| BB_0137 | Longchain-fatty-acid CoA lig         | 0.64 $\pm$ 0.15 | 0.0001  | 1.56     |
| BB_0153 | Superoxide dismutase                 | 0.64 $\pm$ 0.11 | 0.0001  | 1.56     |
| BB_0195 | Cell div. control prot 27, putative  | 0.64 $\pm$ 0.04 | 0.0001  | 1.56     |
| BB_0488 | Ribosomal prot L14                   | 0.64 $\pm$ 0.1  | 0.0001  | 1.56     |

|         |                                     |           |        |      |
|---------|-------------------------------------|-----------|--------|------|
| BB_B28  | Predicted protein                   | 0.64±0.21 | 0.0001 | 1.56 |
| BB_0653 | Protein-export memb prot. SecF      | 0.65±0.05 | 0.0001 | 1.53 |
| BB_K13  | Predicted protein                   | 0.65±0.33 | 0.0041 | 1.53 |
| BB_0087 | L-lactate dehydrogenase             | 0.66±0.21 | 0.0002 | 1.51 |
| BB_0203 | Lambda CII stability-gov prot (HfK) | 0.67±0.14 | 0.0001 | 1.49 |
| BB_0069 | Aminopeptidase II                   | 0.68±0.17 | 0.0001 | 1.47 |
| BB_0151 | N-acetylglucos-6-P deacetylase      | 0.68±0.25 | 0.0016 | 1.47 |
| BB_0226 | Seryl-tRNA synthetase               | 0.68±0.19 | 0.0001 | 1.47 |
| BB_0227 | Predicted protein                   | 0.68±0.16 | 0.0001 | 1.47 |
| BB_0366 | Aminopeptidase I                    | 0.68±0.34 | 0.0095 | 1.47 |
| BB_0463 | Nucleoside-diphosph kinase          | 0.68±0.17 | 0.0001 | 1.47 |
| BB_0537 | Predicted protein                   | 0.68±0.3  | 0.0044 | 1.47 |
| BB_0761 | Prot chemotax resp.reg, putative    | 0.68±0.16 | 0.0001 | 1.47 |
| BB_P38  | ErpA                                | 0.69±0.13 | 0.0001 | 1.47 |
| BB_0445 | Fruc-bisphosph aldolase             | 0.69±0.32 | 0.0088 | 1.44 |
| BB_0642 | Sperm/putresc ABC transport         | 0.7±0.31  | 0.0086 | 1.44 |
| BB_0335 | OppF                                | 0.71±0.17 | 0.0002 | 1.42 |
| BB_0300 | Cell division prot                  | 0.71±0.23 | 0.0016 | 1.4  |
| BB_0551 | CheY-1                              | 0.72±0.16 | 0.0001 | 1.4  |
| BB_0606 | Predicted protein                   | 0.73±0.14 | 0.0001 | 1.38 |
| BB_0034 | Predicted protein                   | 0.73±0.19 | 0.0006 | 1.36 |
| BB_0449 | Predicted protein                   | 0.73±0.25 | 0.004  | 1.36 |
| BB_0553 | Predicted protein                   | 0.73±0.23 | 0.002  | 1.36 |
| BB_B18  | GMP synthase                        | 0.73±0.2  | 0.0001 | 1.36 |
| BB_L34  | Predicted protein                   | 0.73±0.25 | 0.0038 | 1.36 |
| BB_Q34  | BdrW                                | 0.74±0.06 | 0.0001 | 1.36 |
| BB_0376 | MetK                                | 0.75±0.14 | 0.0001 | 1.35 |
| BB_0103 | Predicted protein                   | 0.76±0.13 | 0.0001 | 1.33 |
| BB_0047 | Predicted protein                   | 0.76±0.36 | 0.0476 | 1.31 |
| BB_0405 | Predicted protein                   | 0.76±0.34 | 0.0423 | 1.31 |
| BB_0546 | Predicted protein                   | 0.76±0.14 | 0.0001 | 1.31 |
| BB_0695 | Ribosomal prot S16                  | 0.76±0.28 | 0.0149 | 1.31 |
| BB_0752 | Predicted protein                   | 0.77±0.13 | 0.0001 | 1.31 |
| BB_0840 | Lipoprotein, putative               | 0.78±0.13 | 0.0001 | 1.29 |
| BB_0169 | Translation initiat factor 1        | 0.79±0.27 | 0.0257 | 1.28 |
| BB_0325 | Predicted protein                   | 0.78±0.17 | 0.0014 | 1.28 |
| BB_B17  | IMP dehydrogenase                   | 0.78±0.32 | 0.0455 | 1.28 |
| BB_0705 | Ribonuclease III                    | 0.82±0.05 | 0.0001 | 1.26 |
| BB_0194 | Predicted protein                   | 0.82±0.22 | 0.0211 | 1.21 |
| BB_0575 | CTP synthase                        | 0.82±0.05 | 0.0001 | 1.21 |
| BB_0599 | Cysteinyl-tRNA synthetase           | 0.83±0.06 | 0.0001 | 1.21 |
| BB_F20  | Predicted protein                   | 0.83±0.13 | 0.0012 | 1.2  |

Mean values and standard deviations were determined using 12 input results obtained from iTRAQ quantification values. P values were calculated based upon the 12 input results using a two-sided, one sample *t* test with comparison against a theoretical value of 1.0.

Colored cells contain proteins whose expression is reported to be regulated only by HrpA.. The complete list of proteins identified in the iTRAQ experiment is given in **Table S2**.
